# Supplementary material for: Study on Sustainable Application of Low-Carbon Supersulfated Cement with Alkanolamines
Source: MDPI journal article supplement (doi:10.3390/su16073008), 2024-04-04
Supplement: s1 [file s1]

**Table S2.** Detailed compressive strength data of SSC adding TEA at 3 d (MPa).

| <b>3 d</b>         | <b>Blank</b> | <b>TEA0.02</b> | <b>TEA0.04</b> | <b>TEA0.06</b> | <b>TEA0.08</b> |
|--------------------|--------------|----------------|----------------|----------------|----------------|
| 1                  | 14.90        | 21.18          | 20.73          | 21.65          | 23.53          |
| 2                  | 13.05        | 18.54          | 21.78          | 22.98          | 20.95          |
| 3                  | 15.15        | 17.64          | 24.48          | 23.80          | 21.33          |
| 4                  | 15.18        | 17.91          | 21.63          | 24.25          | 21.43          |
| 5                  | 16.25        | 18.13          | 22.78          | 23.38          | 24.88          |
| 6                  | 13.53        | 19.01          | 22.78          | 21.85          | 23.30          |
| average value      | 14.68        | 18.73          | 22.36          | 22.98          | 22.57          |
| standard deviation | 1.18         | 1.29           | 1.29           | 1.05           | 1.56           |

**Table S3.** Detailed compressive strength data of SSC adding TEA at 28 d (MPa).

| <b>28 d</b>        | <b>Blank</b> | <b>TEA0.02</b> | <b>TEA0.04</b> | <b>TEA0.06</b> | <b>TEA0.08</b> |
|--------------------|--------------|----------------|----------------|----------------|----------------|
| 1                  | 23.09        | 29.75          | 33.18          | 29.98          | 34.69          |
| 2                  | 23.69        | 28.95          | 32.93          | 30.70          | 33.22          |
| 3                  | 21.35        | 28.48          | 29.40(X)       | 33.03          | 32.90          |
| 4                  | 22.21        | 27.53          | 32.18          | 30.18          | 35.00          |
| 5                  | 23.47        | 27.45          | 33.23          | 33.28          | 25.85(X)       |
| 6                  | 25.17        | 25.88          | 34.20          | 33.18          | 41.83(X)       |
| average value      | 23.16        | 28.00          | 33.14          | 31.72          | 33.95          |
| standard deviation | 1.31         | 1.36           | 0.73           | 1.59           | 1.05           |

**Table S4.** Detailed compressive strength data of SSC adding DEIPA at 3 d (MPa).

| <b>3 d</b>         | <b>Blank</b> | <b>DEIPA0.02</b> | <b>DEIPA0.04</b> | <b>DEIPA0.06</b> | <b>DEIPA0.08</b> |
|--------------------|--------------|------------------|------------------|------------------|------------------|
| 1                  | 15.38        | 17.83            | 18.55            | 22.10            | 25.40            |
| 2                  | 16.03        | 17.38            | 19.85            | 23.53            | 24.73            |
| 3                  | 15.43        | 18.05            | 19.63            | 22.88            | 27.33            |
| 4                  | 14.95        | 17.40            | 20.48            | 20.30            | 25.83            |
| 5                  | 15.73        | 18.85            | 18.83            | 20.60            | 26.43            |
| 6                  | 14.85        | 16.73            | 21.65            | 23.55            | 25.43            |
| average value      | 15.39        | 17.70            | 19.83            | 22.16            | 25.85            |
| standard deviation | 0.45         | 0.72             | 1.13             | 1.43             | 0.91             |

**Table S5.** Detailed compressive strength data of SSC adding DEIPA at 28 d (MPa).

| <b>28 d</b>   | <b>Blank</b> | <b>DEIPA0.02</b> | <b>DEIPA0.04</b> | <b>DEIPA0.06</b> | <b>DEIPA0.08</b> |
|---------------|--------------|------------------|------------------|------------------|------------------|
| 1             | 22.95        | 26.22            | 31.35            | 37.26            | 36.85            |
| 2             | 22.68        | 26.36            | 30.80            | 34.90            | 38.93            |
| 3             | 23.00        | 23.04            | 33.90            | 36.13            | 37.95            |
| 4             | 23.55        | 24.53            | 32.53            | 35.13            | 37.38            |
| 5             | 22.73        | 27.19            | 32.73            | 34.49            | 39.53            |
| 6             | 21.88        | 24.44            | 34.60            | 38.32            | 40.45            |
| average value | 22.80        | 25.30            | 32.65            | 36.04            | 38.51            |

|                    |      |      |      |      |      |
|--------------------|------|------|------|------|------|
| standard deviation | 0.55 | 1.55 | 1.45 | 1.50 | 1.37 |
|--------------------|------|------|------|------|------|

**Table S6.** Detailed compressive strength data of SSC adding TIPA at 3 d (MPa).

| 3 d                | Blank | TIPA0.02 | TIPA0.04 | TIPA0.06 | TIPA0.08 |
|--------------------|-------|----------|----------|----------|----------|
| 1                  | 15.30 | 14.83    | 15.95    | 17.15    | 17.03    |
| 2                  | 14.85 | 15.25    | 14.83    | 16.88    | 17.63    |
| 3                  | 14.08 | 14.75    | 15.00    | 16.68    | 16.63    |
| 4                  | 14.83 | 15.15    | 15.28    | 16.63    | 17.68    |
| 5                  | 14.15 | 13.43    | 16.13    | 16.78    | 18.08    |
| 6                  | 15.48 | 14.50    | 16.13    | 17.40    | 18.63    |
| average value      | 14.78 | 14.65    | 15.55    | 16.92    | 17.61    |
| standard deviation | 0.58  | 0.66     | 0.59     | 0.30     | 0.72     |

**Table S7.** Detailed compressive strength data of SSC adding TIPA at 28 d (MPa).

| 28 d               | Blank | TIPA0.02     | TIPA0.04 | TIPA0.06     | TIPA0.08     |
|--------------------|-------|--------------|----------|--------------|--------------|
| 1                  | 22.55 | 20.73        | 20.28    | invalid data | 20.64        |
| 2                  | 21.58 | 20.25        | 20.28    | 21.03        | invalid data |
| 3                  | 21.35 | invalid data | 20.90    | 21.18        | 21.16        |
| 4                  | 22.74 | 21.30        | 20.68    | 20.48        | 22.31        |
| 5                  | 22.65 | 19.03        | 20.75    | 22.03        | 19.84        |
| 6                  | 23.69 | 21.25        | 20.28    | 20.40        | 20.73        |
| average value      | 22.43 | 20.51        | 20.53    | 21.02        | 20.94        |
| standard deviation | 0.85  | 0.93         | 0.28     | 0.65         | 0.90         |
